# Supplementary material for: Development of a Polymersome-Based Nanomedicine for Chemotherapeutic and Sonodynamic Combination Therapy
Source: MDPI journal article supplement (doi:10.3390/ijms24021194), 2023-01-07
Supplement: s1 [file s1]

## Supplementary Materials

# Development of a Polymersome-Based Nanomedicine for Chemotherapeutic and Sonodynamic Combination Therapy

Mingyun Kim <sup>1,†</sup>, Doyeon Kim <sup>1,†</sup>, Yongho Jang <sup>1</sup>, Hyounkoo Han <sup>1</sup>, Seonock Lee <sup>2</sup>,  
Hyungwon Moon <sup>3</sup>, Jungho Kim <sup>2</sup> and Hyuncheol Kim <sup>1,\*</sup>

<sup>1</sup> Department of Chemical and Biomolecular Engineering, Sogang University, 35 Baekbeom-ro, Mapo-gu, Seoul 04107, Republic of Korea

<sup>2</sup> Department of Life Science, Sogang University, 35 Baekbeom-ro, Mapo-gu, Seoul 04107, Republic of Korea

<sup>3</sup> R&D Center, IMGT Co., Ltd., Seongnam-si, Gyeonggi-do 13605, Republic of Korea

\* Correspondence: hyuncheol@u.sogang.ac.kr

† These authors contributed equally to this work.

**A**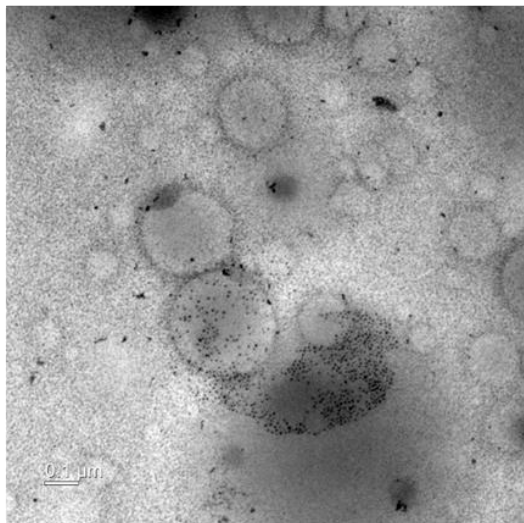**B**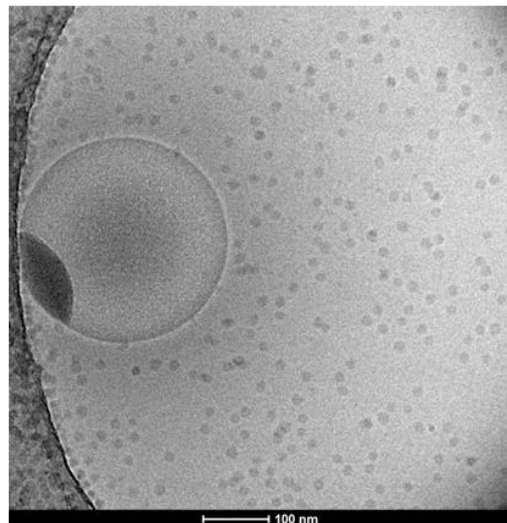

**Figure S1.** (A) TEM images of VP-DOX-PLs using gold nanoparticles (B) Cryo-EM image of VP-DOX-PLs

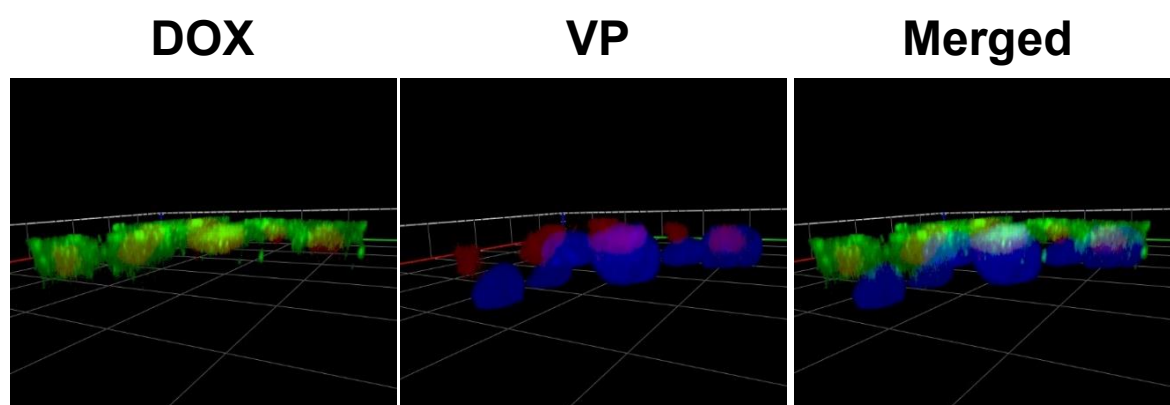

**Figure S2.** 3D stacking images of VP-DOX-PLs. (40x magnification)

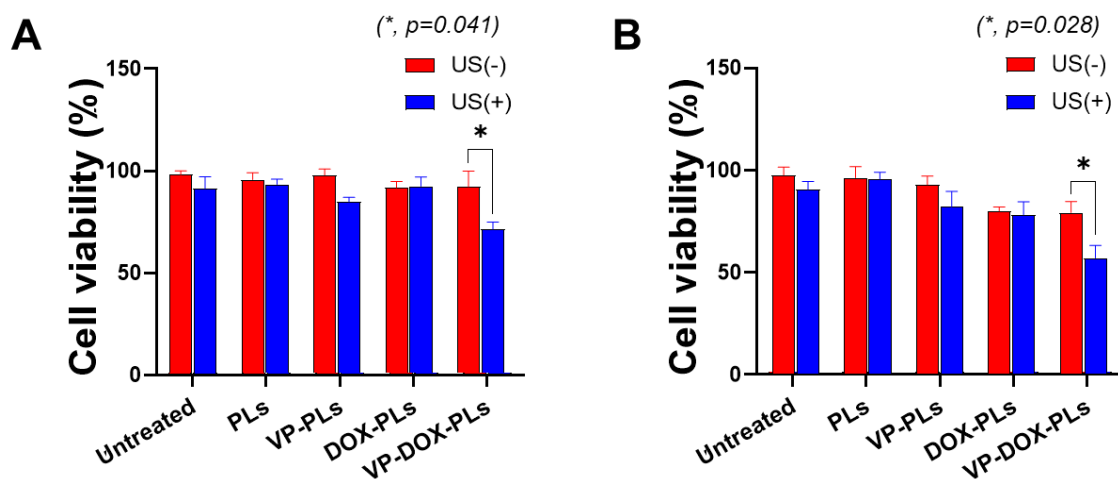

**Figure S3.** Cytotoxicity of VP-DOX-PLs compared with other groups with and without US. US was applied with a power of  $0.3\text{W}/\text{cm}^2$  and duty cycle of 50% for 10 seconds per well. Asterisk (\*) means P value less than 0.001 compared with all other groups ( $P<0.001$ ) after (A) 3h and (B) 6h

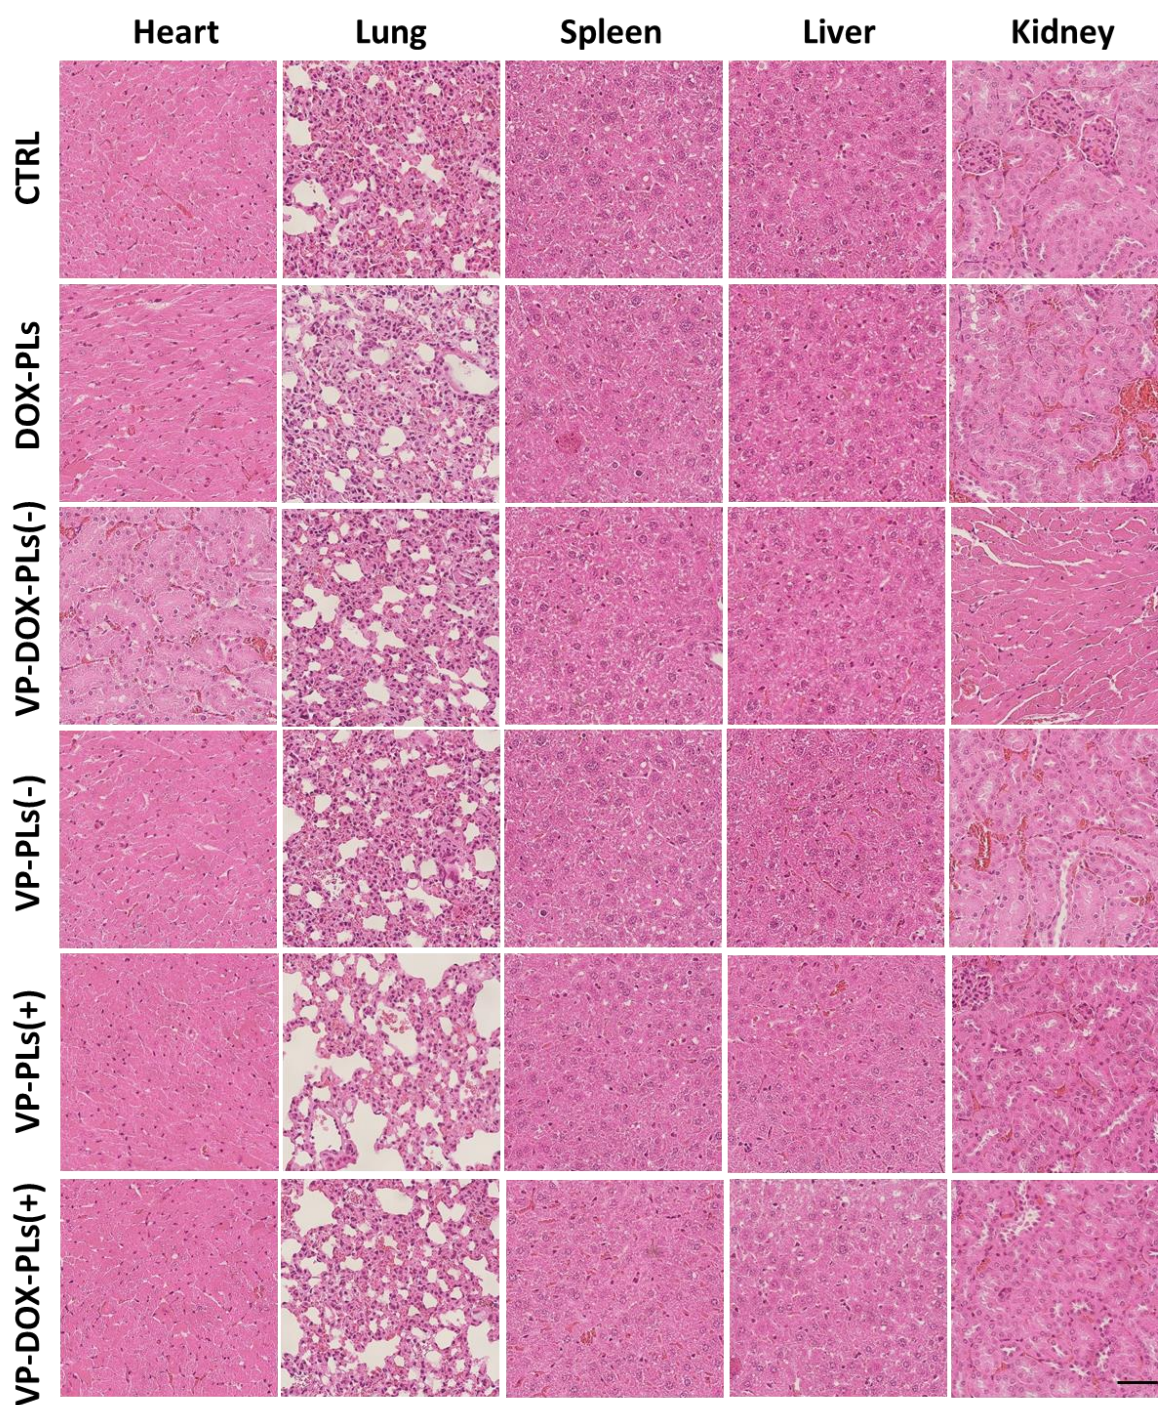

**Figure S4.** Histopathological examination of various treatment groups. H&E staining of normal organs from tumor-bearing nude mice treated with various treatment groups. Scale bar indicates 40  $\mu\text{m}$ .
